# Supplementary material for: Suicide and Microglia: Recent Findings and Future Perspectives Based on Human Studies
Source: Front Cell Neurosci. 2019 Feb 13;13:31. doi: 10.3389/fncel.2019.00031 (PMC6381042; doi:10.3389/fncel.2019.00031)
Supplement: Supplementary file 1 [file Table_1.xlsx]

## Sheet: Sheet2
	Table S1. Human postmortem studies focusing on microglia in the brain of psychiatric patients including suicide victims.
	Study reference	Patient groups	Sample size (female/male) (Subgroup (female/male))	Age (years): Mean ± SD, range	Postmotem interval (hour)	Cause of death: Suicide victims	Cause of death: Control	Microglial markers	Anatomical regions	Main findings
	Steiner et al., 2006	Schizophrenia	Schizophrenia: 16 (8/8) (including suicide victims: 2 (1/1)) Control: 16 (8/8)	Shizophrenia: 54.5 ± 7.6 (Suicide victims: 24 ± 0) Control: 57.7 ± 8.6	Shizophrenia: 43.1 ± 17.4 (Suicide victims: 24 ± 0) Control: 36.6 ± 20.6	Strangulation: 1 Drowning: 1	Heart failure: 6 Myocardial infarction: 3 Retroperitoneal hemorrhage: 1 Gastrointestinal hemorrhage: 1 Status asthmaticus: 1 Acute respiratory failure: 1 Ruptured aortic aneurysm: 1 Pulmonary embolism: 1 Sudden death: 1	HLA-DR	DLPFC, ACC, Hippocampus, MD	No signiﬁcant differences of microglial cell density were seen between cases with schizophrenia and controls. But single case analysis revealed highly elevated microglial cell numbers in the ACC and MD, respectively, of two individuals with schizophrenia who had committed suicide during acute psychosis.
	Steiner et al., 2008	Shizophrenia Depressed patients with affective disorder	Schizophrenia: 16 (9/7) (including suicide victims: 6 (4/2)) Depressed patients: 14 (8/6) (including suicide victims: 7 (4/3)) Control: 10(5/5)	Schizophrenia: 53 ± 9 (Suicide victims: 50 ± 10) Depressed patients: 49 ± 13 (Suicide victims: 41 ± 10) Control: 54 ± 7	Schizophrenia: 39 ± 19 (Suicide victims: 41 ± 28) Depressed patients: 39 ± 18 (Suicide victims: 38 ± 14) Control: 39 ± 22	Hanging: 6 Drug overdose: 2 Drowning: 1 Jumping: 2 Stabbing: 1 Electrocution: 1	Heart failure: 4 Retroperitoneal hemorrhage: 1 Status asthmaticus: 1 Acute respiratory failure: 1 Ruptured aortic aneurysm: 1 Pulmonary embolism: 1 Sudden death: 1	HLA-DR	DLPFC, ACC, Hippocampus, MD	No signiﬁcant differences in microglial cell-density were found between cases with schizophrenia or affective disorder and controls. There were also no significant differences related to gender. However significant microgliosis was observed in suicide patients - regardless of diagnosis.
	Schnieder et al., 2014	Suicide victims with psychiatric disorders including shizophrenia and affective disorder	Suicide victims: 11 (6/5) (Shizophrenia: 3(2/1), Affective disorders: 5(4/1), No psychiatric illness: 3(0/3)) Non-suicide victims: 25 (12/13) (Shizophrenia: 7(4/3), Affective disorders: 3(2/1), No psychiatric illness: 15(6/9))	Suicide victims: 56 ± 18 Non-suicide victims: 55 ± 16	Suicide victims: 12 ± 8 Non-suicide victims: 15 ± 7	Respiratory: 7 Traumatic: 3 Poisoning: 1	Respiratory: 4 Traumatic: 11 Poisoning: 1 Cardiac: 7 Other medical conditions: 2	Iba-1 CD68	White matter of the frontal lobe; a coronal slice at the level of the rostral tip of the frontal horn of the lateral ventricle.	No effect of psychiatric diagnosis on microglial density, but 2 significant effects of suicide: 1) the dorsal-ventral difference in activated microglial density was reversed such that with suicide, the density was greater in ventral than in dorsal prefrontal white matter, whereas in the absence of suicide, the opposite was true; and 2) with suicide there was a greater density of Iba-1-immunoreact…
	Torres-Platas et al., 2014	Suicide victims with MDD	Suicide victims with MDD: 24 (6/18) Control: 17 (1/16)	Suicide victims with MDD: 46 ± 3.63 Control: 39 ± 4.53	Suicide victims with MDD: 42.72 ± 5.19 Control: 45.93 ± 4.5	Hanging: 15 Intoxicaton: 7 Jamping: 1 Drowning: 1	Cardiovascular: 7 Road accident: 6 Accidental hanging: 1 Fall: 1 Intoxication: 2	Iba-1 CD45	Dorsal ACC	Total densities of IBA1-IR microglia did not differ between depressed suicides and controls. The ratio of primed over ramified (‘‘resting’’) microglia was significantly increased in depressed suicides. The proportion of blood vessels surrounded by a high density of macrophages was more than twice higher in depressed suicides than in controls. Gene expression of IBA1 and MCP-1 was significantly up…
	Brisch et al., 2017	Suicide victims with depression or shizophrenia	Suicide victims: 24 (Depressed patients: 16(9/7), Shizophrenia: 8(4/4)) Non-suicide victims: 21 (Depressed patients: 11(4/7), Shizophrenia: 10(3/7)) Control: 22(15/7)	Suicide victims: 48 ± 12.4 Non-suicide victims: 54 ± 9.7 Control: 52 ± 11.4	Suicide victims: 24 ± 23.2 Non-suicide victims: 48 ± 21.4 Control: 24 ± 20.2	Jamping: 3 Hanging: 10 Drowning: 1 Intoxication: 5 Self strangulation: 4 Self harm: 2	Respiratory: 1 Pulmonary embolism: 3 Cardiovascular: 14 Sepsis: 2 Ruptured abdominal aortic aneurysm: 1 Exposure to excessive natural heat: 1	HLA-DR	Dorsal raphe nucleus	Only the non-suicidal depressed subgroup revealed significantly lower microglial reaction, i.e., a decreased density of HLA-DR positive microglia versus both depressed suicide victims and controls.
	Abbreviations: MDD, major depressive disorder; ACC, anterior cingulate cortex; DLPFC, dorsolateral prefrontal cortex; MD, mediodorsal thalamus; Iba-1, ionized calcium-binding adapter molecule 1; CD68, cluster of differentiation 68.
